1     **Occupational hazards and risks among the women in**  
2     **fisher communities in Cox’s Bazar and Chattogram**

3  
4  
5     Charls Erik Halder<sup>1\*</sup>, Partha Pratim Das<sup>2</sup>, S.M. Tareq Rahman<sup>3</sup>, Liton Chandra Bhoumick<sup>3</sup>,  
6     Hamim Tassdik<sup>3</sup>, Md Abeed Hasan<sup>3, 4</sup>, Sourav Nath Mithun<sup>3</sup>

7  
8     1. Public health and research division, Bright Bangladesh Forum, Chattogram, Bangladesh

9     2. Department of Public Health, State University of Bangladesh, Dhaka, Bangladesh

10    3. Department of Public Health, North South University, Dhaka, Bangladesh

11    4. UFR Sciences du Vivant, Universite Paris Cite, Paris, France

12

13

14    \* Corresponding author

15    Email: [cehalder@outlook.com](mailto:cehalder@outlook.com)

16

## 17 **Abstract:**

18 **Background:** Women in the fisher communities in coastal regions of Bangladesh are engaged  
19 in a wide range of fishery activities including fish sorting, grading, cutting, dry fish processing,  
20 transporting and selling. However, there is limited evidence available on the occupational  
21 hazards and risks experienced by them.

22 **Method:** The study was conducted among fishing colonies in Cox's Bazar and Chattogram  
23 districts in Bangladesh. This was a cross-sectional study comprised of both qualitative and  
24 quantitative approaches. Data were primarily collected through eight focus group discussions  
25 (FGD) and a quantitative survey of a sample of 207 women working in fisheries sector.

26 **Findings:** The study found a high occurrence of occupational hazards, health risks and disease  
27 conditions and limited availability of preventive measures among the women in the fisher  
28 communities in the coastal Bangladesh. Occupational hazards include physical safety hazards,  
29 like slippery surface, fish cutting instruments, fish sting or bite and contact with fishes; physical  
30 hazards, like prolonged sun exposure and noise; chemical hazards like pesticides, salt and salt  
31 water; ergonomic hazards, like prolonged sitting or standing in uncomfortable posture and  
32 heavy weight lifting; and biological hazards, like inadequate provision of sanitary latrine or hand  
33 washing soap at workplace. The study also found occupational risks resulting from the hazards  
34 including injuries (87.44%), musculoskeletal conditions (69.08%), skin diseases/conditions  
35 (56.52%), eye complaints (33.82%), severe respiratory distress (24.15%) and high incidence of  
36 self-reported communicable diseases. Majority of the women did not use personal protection  
37 equipment at their workplace (78.26%) and have a first aid kit at their workplace (93.72%).

38 **Conclusion:** This study highlights the critical occupational health and safety challenges faced  
39 by the women in the fisheries sector. A comprehensive multisectoral strategy needs to be

40 undertaken to mitigate the occupational hazards and prevent associated diseases among the  
41 women in fisher communities promoting their health and wellbeing.

42

## 43 **Background:**

44 Globally, fisheries and aquaculture sector produce more than two hundred million tonnes of fish,  
45 aquatic animals and algae critically contributing to global food security and nutrition. <sup>1</sup> This  
46 industry employs over 58.5 million people worldwide, with women making up 21% of those  
47 workers. <sup>2</sup> In Bangladesh, around 17 million people depend on fishing, fish farming, fish  
48 handling, and fish processing for their sustenance.<sup>3</sup> Marine fishery is vital component in  
49 Bangladesh's fishing industry because of the country's extensive coastline and marine zone.

50 Around 30% of the women in rural and coastal areas of Bangladesh are engaged in fisheries  
51 sector.<sup>4</sup> Women in fisher communities in Bangladesh have a twofold dilemma since patriarchal  
52 societal norms limit their activities to the home, but rising poverty and landlessness also force  
53 them to look for wage work. Thereby, they are to play both role, fishing activities as well as  
54 traditional household chores. An earlier baseline study in Cox's Bazar and Chattogram revealed  
55 that women in the fisher communities were engaged in a wide range of fisheries activities  
56 including fish sorting, grading, cutting, dry fish processing, dry fish paste (*Nappi*) processing,  
57 daily laboring in fish farms, transporting, selling fish or fish products, net making, ice processing,  
58 fish basket making, and collecting minnow and seashells from the sea shores.<sup>5</sup> Still,  
59 traditionally, fishing and related activities in Bangladesh are considered to be the occupation of  
60 men in Bangladesh, particularly in coastal regions, and women's contributions to this sector are  
61 grossly neglected.

62 Globally, people engaged in fishery sector encounter numerous occupational hazards, including  
63 the risk of boat capsizing, slippery surface, unsafe handling of heavy weight, fish bites and  
64 stings, snake and insect bites and exposure to physical hazards, like sun, salt water and noise,  
65 which may result in various illness and deteriorated health conditions, including injuries,  
66 fatalities, skin, respiratory and auditory diseases.<sup>6-8</sup>, According to the World Health Organisation  
67 (WHO) and the International Labour Organisation (ILO), globally, almost 2 million individuals  
68 died as a result of occupational hazards in 2016.<sup>9</sup>

69 The Committee on Fisheries (COFI) declaration for sustainable fisheries and aquaculture  
70 emphasized to enhance women's full access to and equal opportunities in the fisheries sector.<sup>10</sup>  
71 To achieve this, occupational safety and health of the women engaged in the fisheries should  
72 be a key consideration. There are several studies available both at country and global level on  
73 the occupational hazards encountered by the men in the fisheries sector. However, only a few  
74 studies<sup>11-12</sup> available that identified occupational hazards and risk factors of women engaged in  
75 fishery activities. In Bangladesh, there is no study available on the occupational hazards of  
76 women working in fisheries, except, a qualitative study<sup>13</sup> found that women engaged in fishing  
77 with their children possesses the risk of drowning since the traditional cloths are not flexible  
78 enough for free-movement in the water.

79 Fishery is one of the oldest and most prevalent occupations in Cox's bazar and Chattogram  
80 coastal communities. Fishery engages a wide range of occupational activities, including  
81 production, harvesting, processing, handling, storage and transportation. Traditionally, men and  
82 women have different roles, while men are mostly engaged in harvesting, women are mostly  
83 engaged in fish processing. Therefore, women may experience distinctive hazards and risks in  
84 their occupation, which is vital to reveal to ensure a safe work environment for them. Moreover,  
85 it is also essential to understand the measures in place to prevent occupational hazards and  
86 risks, such as personal safety training and personal protection equipment, for proper planning of

87 preventive strategies. The study was conducted to identify the different occupational hazards  
88 that women in fisher communities in Chattogram and Cox's Bazar were exposed to, the  
89 occupational risks that ensued from those hazards, and the extent of health and safety  
90 measures that were in place to prevent occupational health hazards.

91

## 92 **Methodology:**

### 93 **Study Setting:**

94 The study was conducted among fishing communities in Cox's Bazar and Chattogram districts  
95 in Bangladesh. Table 1 shows the detailed breakdown of the study location.

96

97 **Table 1. Study location**

98

| District    | City Upazila                | Study sites  |
|-------------|-----------------------------|--------------|
| Chattogram  | Chattogram City Corporation | Fisherighat  |
|             |                             | Kotowali     |
|             |                             | Bastuhara    |
| Cox's Bazar | Cox's Bazar Sadar Upazila   | Chowfaldandi |
|             |                             | Samiti para  |
|             |                             | Naziratek    |
|             | Kutubdia para               |              |
|             | Ukhiya Upazila              | Jaliapalong  |

99

100

101 The study sites in Cox's Bazar are located by the Bay of Bengal and inhabited by thousands of  
102 fisherfolk communities. Livelihood in these areas is mostly tied to fishing from the sea and  
103 related fishery activities. Naziratek-Samitipara area, the largest dry fish processing zone of the  
104 country, accommodates hundreds of dry fish processing trades. Chowfaldandi area is also  
105 inhabited by indigenous Rakhaine community. A traditional delicacy of the indigenous people,

106 powdered dry fish (also known as *nappi* locally), is prepared here and exported to the  
107 indigenous populations in various districts of Bangladesh. Study sites in Chattogram are located  
108 by the river Karnaphulli, where fisher colonies are engaged in fishing and fish processing.

109

## 110 **Study design:**

111 This was a cross-sectional study comprised of both qualitative and quantitative approaches  
112 aimed to explore the occupational health hazards and risks of women in the fisher communities  
113 in Chattogram and Cox's Bazar. The study had an exploratory sequential design – qualitative  
114 data collection and analysis was done in first place to understand the occupational setting,  
115 hazards and risks and helped in development of data collection tool for subsequent quantitative  
116 survey. The recruitment period of the study was from 29<sup>th</sup> August 2023 to 30<sup>th</sup> October 2023.

117

118 The qualitative study comprised of six focus group discussions (FGD), two at Chattogram, two  
119 at Cox's Bazar Sadar and one at Ukhiya Upazila. This was conducted to get in-depth  
120 understanding of a) socio-economic situation of the women in fisherfolk, b) potential physical  
121 safety, physical, chemical, biological and ergonomic hazards experienced by them, c) potential  
122 outcomes of the hazards to different human system and d) existing situation of health and safety  
123 measures at workplace. A total of 64 women from fisherfolk participated in the FGDs, each  
124 participated by five to eight individuals. A semi-structured guiding questionnaire was used for  
125 guiding the discussion, which was developed based on previous studies.<sup>7,8,11,12</sup> The guiding  
126 questionnaire was piloted among a group of 5 fisherfolk women to ensure its validity and  
127 reliability. The principal investigator and 5 trained research assistants facilitated the FGDs. At  
128 each FGD, one research assistant was assigned as the note taker and to ensure proper audio-  
129 recording of the discussion. An interpreter fluent in local Chittagongian language was engaged

130 at the FGDs to eliminate the linguistic barriers. Average duration of each FGD was around 90  
131 minutes.

132  
133 The quantitative component of the study included survey of women working in fisheries sector  
134 using a structured questionnaire. The questionnaire form was deployed through the Kobo  
135 toolbox for data collection. The questionnaire was developed in line with the research objectives  
136 and potential occupational health hazards and illnesses explored through the qualitative study  
137 as well as the health and safety measures recommended by the Convention 188 of the  
138 International Labor Organization (ILO).<sup>6</sup> The questionnaire comprised questions in relation to a)  
139 socio-demographic profile of the participants, b) exposure to physical safety, physical, chemical,  
140 biological and ergonomic hazards, c) potential outcomes of the occupational hazards to different  
141 human systems and d) status and practice of different health and safety measures. The  
142 questionnaire was initially piloted with 10 participants, and adjustments was made as needed in  
143 the final version based on the results of the testing. 4 enumerators, who were fluent in local  
144 language, under the supervision of the research assistants were responsible for the quantitative  
145 data collection using the Kobo toolbox form.

146  
147 The research assistants and enumerators were adequately trained on the research objectives  
148 and scopes, data collection instrument and procedures. The team was also oriented on the  
149 obtaining informed written consent and maintaining proper privacy and confidentiality.

150

## 151 **Study population, sampling and sample size**

152 The study was implemented in 8 selected sites in Cox's Bazar and Chattogram, which  
153 accommodates around 7,000 fisherfolk families. Study sites were purposively selected where  
154 diversified fishery activities are prevalent. To determine the appropriate sample size for the

155 quantitative study, the researchers used a calculated occupational injury rate of 85% from a  
156 similar setting<sup>14</sup> as a reference point. Cochran's formula was applied to calculate the sample  
157 size required for a 95% confidence level and a 5% sampling error. Initially, this calculation  
158 yielded a sample size of 191. However, the researchers decided to adjust the final sample size  
159 to 207 participants considering the potentiality of unresponsiveness. Participants were selected  
160 using the simple random sampling from a local list of fisher families

161  
162 For qualitative study, number of each focus group discussion was between 6 to 12 as  
163 recommended by empirical studies,<sup>15-17</sup> making a total of 48 participants, all were women  
164 engaged in fisheries activities. Participants were purposively selected with the assistance of  
165 local volunteers.

166

## 167 **Data analysis:**

168 The qualitative data, i.e. FGD transcripts, were transcribed verbatim and manually analyzed  
169 using a thematic analysis approach. This involved identifying recurring themes, patterns, and  
170 insights from the qualitative data, contributing to a richer understanding of the occupational  
171 health hazards and their impact faced by women in the fisherfolk communities. Descriptive  
172 analysis of the data collected through the structured survey questionnaire was carried out using  
173 the built-in analysis tools in Kobo Toolbox and SPSS (Statistical Package for the Social  
174 Sciences).

175

## 176 **Ethical consideration:**

177 The Institutional Review Board (IRB) and Ethics Review Committee (ERC) of North South  
178 University in Bangladesh approved the research protocol (2023/OR-NSU/IRB/0810). All



179 participants willingly gave written informed consent, primarily through thumbprints, and these  
180 consent documents were securely stored. The study adhered to the "no-harm" principle,  
181 ensuring no legal risks for participants. Each step was conducted in accordance with the  
182 venerable Helsinki Declaration (1964) and its 2013 revision.

183

## 184 **Results:**

### 185 **Demographic profile of the participants:**

186 The study engaged 207 women working in the fisheries sector in Cox's Bazar and Chattogram.  
187 Table 2 summarized the demographic profile of the participants. Nearly half of the participants  
188 (43.48%) were aged between 31 to 40 years. More than 20% of the participants were belonging  
189 to 18 to 30 years, and a similar percentage to 40 to 50 years. Majority of the participants could  
190 not sign (64.25%) and 18.36% could only sign. 10.63% studied upto class 5 and only a few  
191 studied upto class 9 (5.80%) or passed secondary school certificate (SSC) (0.97%). No one was  
192 found to be studied beyond the level of SSC. Ethnicity of the majority of the participants were  
193 Bengali (94.20%), 5.80% were tribal belonging to Rakhaine community.

194

195 More than half of the women (54.11%) were engaged in dry fish processing farms, either  
196 commercial or personal. Around one-third (30.43%) were engaged in raw fish processing and  
197 marketing. 7.73% of the women were engaged in dry fish paste (nappi) processing and rest  
198 were engaged in other fishery activities such as minnow or seashell collection. When we asked  
199 about day-to-day activities of the women in the fisher folks, we found that they were engaged in  
200 multiple fishery activities. Three fourth of the women (73.91%) were engaged in fish sorting and  
201 grading. Around one-third of the women engage themselves in fish cutting or removing scales  
202 (34.3%), dry fish processing (32.85%) and minnow collection (32.37%) from seashores. More

203 than quarter of the respondents were engaged as day laborer in fishing farms (28.02%) and in  
204 seashell collection (25.12%). 17.87% of the women were found engaged in dry fish paste  
205 (*nappi*) processing. A few of the women were also found engaged in other fishery activities,  
206 such as supporting direct fishing (8.70%), selling fish or fish products (7.73%), basket  
207 production (6.28%), shopkeeping (5.31%), fishing net making or repairing (2.42%), leading  
208 fishery activities (1.93%) and transporting fish or fish products (1.93%). Majority of the women  
209 dedicated direct manual labour (88.41%) in their fishing industry, while only a few were owner  
210 (3.86%) or played leading role (Majhi) (7.73%) in the fishing industry.

211

212 **Table 2. Socio-economic and demographic variables of the participants**

| Demographic variable         | Number | Percentage (N=207) |
|------------------------------|--------|--------------------|
| <b>Age</b>                   |        |                    |
| 18 – 30 years                | 52     | 25.12%             |
| 31 – 40 years                | 90     | 43.48%             |
| 41 – 50 years                | 45     | 21.74%             |
| 51 – 60 years                | 18     | 8.70%              |
| >60 years                    | 2      | 0.97%              |
| <b>Gender</b>                |        |                    |
| Female                       | 207    | 100.00%            |
| <b>Family type</b>           |        |                    |
| Nuclear                      | 144    | 69.57%             |
| Joint                        | 63     | 30.43%             |
| <b>Education</b>             |        |                    |
| Cannot sign                  | 133    | 64.25%             |
| Can only sign                | 38     | 18.36%             |
| Upto Class 5                 | 22     | 10.63%             |
| Class 6 to Class 9           | 12     | 5.80%              |
| SSC Passed                   | 2      | 0.97%              |
| <b>Ethnicity</b>             |        |                    |
| Bengali                      | 195    | 94.20%             |
| Tribal                       | 12     | 5.80%              |
| <b>Type of fish industry</b> |        |                    |

|                                     |     |        |
|-------------------------------------|-----|--------|
| Dry fish processing                 | 112 | 54.11% |
| Raw fish processing/marketing       | 63  | 30.43% |
| Nappi/ dry fish paste processing    | 16  | 7.73%  |
| Others                              | 16  | 7.73%  |
| <b>Role in the fishing activity</b> |     |        |
| Owner                               | 8   | 3.86%  |
| Leading role (e.g. Majhi)           | 16  | 7.73%  |
| Direct manual labour                | 183 | 88.41% |

213

## 214 Occupational Hazards:

215 The study identified a wide range of physical safety, physical, chemical, biological and  
216 ergonomic hazards exposed by the women working in the fisheries sector. Table 3 summarized  
217 the hazards encountered.

218

219 **Physical safety hazards:** The participants identified a range of physical safety hazards that  
220 caused them injuries. 62% of the participants identified slippery surface at their workplace as a  
221 hazard which causes accidental falls and injuries. 44.4% of the participants reported fishing or  
222 minnow collecting instruments, such as nets and bamboo poles as hazards, and 38% of the  
223 participants reported fish cutting instruments, such as knives, chopper (*da*) and traditional fish-  
224 knives (*boti*) as hazards causing injuries. 58% of the women suggested that they got injuries  
225 either due to fish sting or fish bites while handling the fishes for sorting, grading and processing  
226 for drying. 49% reported that just contact with some species of fish might cause allergic  
227 reactions and inflammations. Other physical hazards reported include sharp stones, corals or  
228 seashells submerged under water (2%), sharp edges of bamboo slices while making fishing  
229 basket (1%), grinding machine of *nappi* or dry fish paste (1%) and risk of drifting away while  
230 working near the coast, especially during collecting minnows (1%).

231

232 **Physical hazards:** Most women in the fisheries sector worked under open sky under direct sun  
233 as 99% of the participants reported they exposed to direct sunlight for more than 4 hours a day.  
234 31% of the women reported that they got exposed to noise at their workplace, mostly from  
235 workplace chaos (29.5%), but also from engine rooms (1%), generators (0.5%) and *Nappi*  
236 grinding machine (0.5%).

237  
238 **Chemical hazards:** Most of the women participated in the study reported that they got contact  
239 salt water (90%) and salt (81%) in their day-to-day work. They encountered salt mainly during  
240 dry fish processing or dry fish paste (*nappi*) processing. Some women (42%) reported to have  
241 contact with or exposed to chemical compounds, especially different kind of insecticides, during  
242 dry fish processing.

243  
244 **Ergonomic hazards:** Majority of the women (91%) reported that in their occupation they need  
245 to work in uncomfortable body posture. 84% women had to sit in an uncomfortable position for  
246 long period. This happens especially during collecting fish from nets, collecting minnows from  
247 the coast, sorting and grading fishes, and cutting or processing fishes, when they have to sit on  
248 their feet without any support to hip or back. More than half of the participated women had to lift  
249 heavy weight, specially, fish and fish products.

250  
251 **Biological hazards:** The study identified some biological hazards that may contribute to  
252 transmission of infectious diseases. Nearly three-fourth of the women reported that they did not  
253 provision of sanitary latrine (72.46%) and handwashing with soap (78.26%) at their workplaces.  
254 Nearly same proportion (74.88%) of the women reported that they need to remain wearing wet  
255 clothes for prolonged time.

256

257 Additionally, during FGDs, women from some fishing communities expressed that they did not  
 258 have any specific time schedule for work or rest. They need to rush whenever the boat arrives.  
 259 Parallel to the economic activities, the women in the fisher communities needed to maintain  
 260 household chores and take care of their children. In some communities, even during off fishing  
 261 season, the women got engaged in non-fisheries activities, such as working as house keepers.  
 262

263 **Table 3. Occupational hazards for women working in fishing industry**

| <b>Physical safety hazards</b>                      |     |        |
|-----------------------------------------------------|-----|--------|
| Slippery surface                                    | 129 | 62%    |
| Fishing or minnow collecting instruments            | 90  | 44.4%  |
| Fish cutting instruments                            | 79  | 38%    |
| Fish sting/fish bite                                | 120 | 58%    |
| Contact with fish                                   | 102 | 49%    |
| Sharp stone/corals or seashells                     | 5   | 2%     |
| Basket making                                       | 2   | 1%     |
| Grinding machine of Nappi                           | 2   | 1%     |
| Drifting away                                       | 2   | 1%     |
| <b>Physical hazards</b>                             |     |        |
| Sun exposure (>4 hours)                             | 205 | 99%    |
| Noise                                               | 65  | 31.4%  |
| <b>Chemical hazards</b>                             |     |        |
| Chemical compounds                                  | 89  | 42.99% |
| Salt water                                          | 191 | 92.27% |
| Salt                                                | 167 | 81%    |
| <b>Ergonomic</b>                                    |     |        |
| Uncomfortable body posture                          | 188 | 91%    |
| Prolonged sitting in an uncomfortable posture       | 174 | 84%    |
| Prolonged standing                                  | 103 | 50%    |
| Heavy weightlifting                                 | 108 | 52%    |
| Repeated pulling/troughing or hanging               | 5   | 2%     |
| <b>Biological</b>                                   |     |        |
| No sanitary latrine at workplace                    | 150 | 72.46% |
| No facility for washing hand with soap at workplace | 162 | 78.26% |
| Working longtime wearing wet clothes                | 155 | 74.88% |

## 264 **Occupational risks or health conditions:**

265 Table 4 summarized the occupational risks in terms of illnesses and health conditions resulting  
266 from the occupational hazards.

267 **Injuries:** 87.44% of the women engaged in fishery industry who participated in the study  
268 reported that they encountered an injury in their lifetime due to fishery activities. The injuries  
269 included sharp cut injury (50.24%), laceration (46.38%), fracture (11.59%), bruise (18.36%),  
270 amputation (2.90%) and blunt trauma injury (20.29%). Around one third of the participants  
271 (30.43%) reported that they developed multiple pores on their hand and feet due to repeated  
272 fish bites or stings. During focus group discussions, some women also expressed that few days  
273 after the injuries sometimes the wounds got infected.

274 **Musculoskeletal disease/complaints:** More than two-third of the women (69.08%)  
275 experienced a musculoskeletal disease condition, such as generalized body ache (45.89%),  
276 back pain (52.66%), neck pain (50.72%), multiple joint pain (28.99%), single joint pain (17.87%),  
277 joint stiffness (7.25%), reduced range of movement (4.35%), weakness of the limbs (35.27%),  
278 numbness of hands or feet (17.39%) and deformity (0.48%). Severity and chronicity of the  
279 disease varied among the participants – 24.64% reported as acute and severe, 33.82%  
280 reported acute but mild, 29.47% reported chronic and severe, and the rest 12.08% reported  
281 chronic mild.

282

283 **Skin disease/symptoms:** More than half of the respondents (56.5%) gave the history that they  
284 recently suffered from a skin disease or had a skin related symptom, which include skin allergy  
285 (42.03%), skin irritation (28.99%), redness of skin (22.71%), and ulceration or wounds over skin  
286 (10.63%).

287 **Eye diseases/complaints:** More than half of the respondents reported that they recently  
288 experienced eye related disease symptoms or had eye diseases, such as eye irritation  
289 (21.26%), ocular pain (23.19%), red eye (25.60%) and reduced vision (25.6%). 3.86% reported  
290 that they encountered an eye injury.

291 **Ear disease/complaints:** Around one-third of the responding women (33.82%) reported that  
292 they recently had an ear disease or experienced ear-related symptoms such as earache  
293 (4.83%), itching in the ear (12.08%), reduced hearing ability (13.04%), and vertigo (27.05%).

294  
295 **Respiratory illnesses/symptoms:** A quarter of the participants reported that they had  
296 symptoms of chronic cough for more than two weeks. 24.15% reported that they had respiratory  
297 distress in last 12 months. 14.01% of the women complained that they had chronic respiratory  
298 discomfort or breathlessness.

299  
300 **Reaction/sensitivity to salt water:** 56.04% of the women participated in the study reported  
301 that exposure to saltwater caused them some kind of physical symptoms, which include burning  
302 sensation of eye (36.23%), skin irritation (30.92%), ear itching (14.49%) and earache (7.73%).

303 **Reaction/ sensitivity or illness due to sun exposure:** Majority of the respondents (85.02%)  
304 informed that prolonged exposure to sun ensued some physical complaints, including headache  
305 (70.53%), skin irritation (28.99%), and eye irritation (36.23%). 59.42% of the women  
306 experienced a sunburn.

307 **Reaction to intense foul smell:** Intense smell from fishes during dry fish or dry fish paste  
308 processing, or chemical compounds causes vertigo among 55.07%, headache among 48.79%  
309 and vomiting among 16.43% of the women.

310

311 **History of communicable diseases in last 12 months:** The self-reported incidence of  
 312 communicable diseases was found very high among the women working in the fisheries sector.  
 313 Communicable diseases experienced in last 12 months include diarrhoea (63.77%), dysentery  
 314 (21.74%), severe respiratory infection (5.31%), flu/viral fever (17.87%), tuberculosis (3.86%),  
 315 scabies (52.17%), tinea (51.21%), and helminthiasis (29.47%).

316

317

318 **Table 4. Occupational risks in terms of illnesses and health conditions**

|                                                                | Number | Percentage (N = 207) |
|----------------------------------------------------------------|--------|----------------------|
| <b>Injury</b>                                                  |        |                      |
| Ever encountered an injury from fishing activity               | 181    | 87.44%               |
| Sharp Cut Injury                                               | 104    | 50.24%               |
| Laceration                                                     | 96     | 46.38%               |
| Fracture                                                       | 24     | 11.59%               |
| Bruise                                                         | 38     | 18.36%               |
| Amputation                                                     | 6      | 2.90%                |
| Blunt Trauma                                                   | 42     | 20.29%               |
| Pores over hand and feet (Due to fish bite/sting)              | 63     | 30.43%               |
| <b>Musculoskeletal disease/complaints:</b>                     |        |                      |
| Suffered from any kind of musculo-skeletal disease/complaints  | 143    | 69.08%               |
| Generalized bodyache                                           | 95     | 45.89%               |
| Back pain                                                      | 109    | 52.66%               |
| Neck pain                                                      | 105    | 50.72%               |
| Multiple joint pain                                            | 60     | 28.99%               |
| Single joint pain                                              | 37     | 17.87%               |
| Joint stiffness                                                | 15     | 7.25%                |
| Reduced range of movement                                      | 9      | 4.35%                |
| Limb weakness                                                  | 73     | 35.27%               |
| Numbness of hands or feet                                      | 36     | 17.39%               |
| Fracture                                                       | 10     | 4.83%                |
| Deformity                                                      | 1      | 0.48%                |
| <b>Skin Problems</b>                                           |        |                      |
| Recently suffered from any kind of skin disease or complaints? | 117    | 56.52%               |
| Skin allergy                                                   | 87     | 42.03%               |
| Skin irritation                                                | 60     | 28.99%               |
| Skin redness                                                   | 47     | 22.71%               |
| Skin ulcer or wounds                                           | 22     | 10.63%               |
| <b>Eye Disease/complaints</b>                                  |        |                      |
| Recently suffered from any type of eye complaints              | 110    | 53.14%               |
| Eye irritation                                                 | 44     | 21.26%               |
| Ocular pain                                                    | 48     | 23.19%               |
| Red Eye                                                        | 53     | 25.60%               |
| Reduced vision                                                 | 53     | 25.60%               |
| Eye Injury                                                     | 8      | 3.86%                |
| <b>Ear disease/complaints</b>                                  |        |                      |
| Recently suffered from any kind of ear disease or complaints   | 70     | 33.82%               |
| Earache                                                        | 10     | 4.83%                |
| Itching in the ear                                             | 25     | 12.08%               |
| Reduced hearing ability                                        | 27     | 13.04%               |



|                                                                           |     |        |
|---------------------------------------------------------------------------|-----|--------|
| Vertigo                                                                   | 56  | 27.05% |
| <b>Respiratory</b>                                                        |     |        |
| Symptoms of chronic cough (>2 weeks)                                      | 53  | 25.60% |
| Severe respiratory distress in last 12 months                             | 50  | 24.15% |
| Chronic respiratory discomfort or breathlessness?                         | 29  | 14.01% |
| <b>Reaction/sensitivity to salt water</b>                                 |     |        |
| Saltwater causes physical symptoms                                        | 116 | 56.04% |
| Burning sensation in eye                                                  | 75  | 36.23% |
| Skin inflammation                                                         | 64  | 30.92% |
| Itching in the ear                                                        | 30  | 14.49% |
| Earache                                                                   | 16  | 7.73%  |
| <b>Reaction/ sensitivity or illness due to sun exposure</b>               |     |        |
| Sun exposure caused any kind of physical symptoms                         | 176 | 85.02% |
| Headache                                                                  | 146 | 70.53% |
| Skin irritation                                                           | 60  | 28.99% |
| Sun burn                                                                  | 123 | 59.42% |
| Burning sensation in eye                                                  | 75  | 36.23% |
| <b>Reaction to intense foul smell</b>                                     |     |        |
| Nausea                                                                    | 1   | 0.48%  |
| Vomiting                                                                  | 34  | 16.43% |
| Vertigo                                                                   | 114 | 55.07% |
| Headache                                                                  | 101 | 48.79% |
| <b>History of communicable diseases in last 12 months (self-reported)</b> |     |        |
| Diarrhoea                                                                 | 132 | 63.77% |
| Dysentery                                                                 | 45  | 21.74% |
| Severe respiratory infection                                              | 11  | 5.31%  |
| Flu/Viral fever                                                           | 37  | 17.87% |
| Tuberculosis                                                              | 8   | 3.86%  |
| Scabies                                                                   | 108 | 52.17% |
| Tinea                                                                     | 106 | 51.21% |
| Helminthiasis                                                             | 61  | 29.47% |

319

320

## 321 **Preventive and safety measures:**

322 Overall, 78.26% of the women responded that they did not use any personal protection  
 323 equipment at their workplace. Table 5 summarized the use of different types of personal  
 324 protection equipment by the women at their workplace.

325 More than 69% of the women never used a mask in their workplace and 17.87% only used on  
 326 rare occasions. 78.74% of the women never used any hand gloves in their workplace and  
 327 6.76% used it rarely. More than 94% of the women never used gumboot. More than 94% of the  
 328 women never used sunscreen or sunglasses for sun protection. 59.90% of the women never

329 used a raincoat or similar material for rain protection, 12.08% used it on rare occasion. As  
330 expressed by the women during FGDs, the common reasons for not using a PPE at workplace  
331 were unavailability of PPE, discouragement by the fish farm owners, and operational  
332 inconvenience.

333 93.72% of the women reported that they did not have any first aid kit at their workplace which  
334 could be accessed during an injury or emergency health condition.

335 Participants also expressed that the fishing farms did not take any liability for treatment or care  
336 in case the workers get injured or sick due to their occupation. There was no special measures  
337 or arrangement organized at the workplace for pregnant or lactating women. Payments were  
338 made based on daily activity, there was no system in place for maternity leave or benefits.

339

340 **Table 5: Use of personal protection equipment by the women working in fishery industry**

| Use of PPE                       | No              | Rarely         | Sometimes      | Often         |
|----------------------------------|-----------------|----------------|----------------|---------------|
| Facemask                         | 143<br>(69.08%) | 37<br>(17.87%) | 26<br>(12.56%) | 1<br>(0.48%)  |
| Hand gloves                      | 163<br>(78.74%) | 14<br>(6.76%)  | 28<br>(13.53%) | 2<br>(0.97%)  |
| Gumboot                          | 196<br>(94.69%) | 9<br>(4.35%)   | 2<br>(0.97%)   | 0<br>(0.00%)  |
| Raincoat/similar rain protection | 124<br>(59.90%) | 25<br>(12.08%) | 34<br>(16.43%) | 13<br>(6.28%) |
| Sunglass                         | 202<br>(97.58%) | 4<br>(1.93%)   | 1<br>(0.48%)   | 0<br>(0.00%)  |
| Sunscreen                        | 195<br>(94.20%) | 6<br>(2.90%)   | 4<br>(1.93%)   | 2<br>(0.97%)  |

341

## 342 **Discussion:**

343 This study gives in-depth insights into the occupational hazards and health risks experienced by  
344 the women actively engaged in the fisheries sector in Cox's Bazar and Chattogram. To the best

345 of the author's knowledge, this is the first study carried among the fisherwomen in Bangladesh  
346 revealing their occupational health hazards and risks. The study found a high occurrence of  
347 occupational hazards, health risks and disease conditions and limited availability of preventive  
348 measures among the women in the fisher communities in coastal areas of Bangladesh.

349 The demographic profile of our study participants reflects the distinctive characteristics of  
350 women working in the fisheries sector in Cox's Bazar and Chattogram. We have found an  
351 alarming status of education among the women in fisheries sector, with most participants unable  
352 to sign or could merely sign, indicating high rate of illiteracy among the women in fisher  
353 communities. Literacy rate is comparatively very low among the fishermen in Bangladesh<sup>18-19</sup>  
354 and due to gender-based discrimination the rate is further low among women in the fisherfolk  
355 communities<sup>5</sup>. Such a lack of education may have an impact on their awareness of work  
356 hazards as well as their capacity to acquire and comprehend safety information and procedures.  
357 Therefore, awareness raising, and prevention strategies related to occupational hazards should  
358 be customized based on the education status of the women.

359 Our study revealed that women were engaged in mainly three types of fisheries industries - dry  
360 fish processing, raw fish processing and marketing and dry fish paste (*nappi*) processing, with  
361 majority of them (88.41%) dedicating direct manual labour. Traditionally, women in the coastal  
362 regions of Bangladesh are not engaged in fish harvesting, which is usually seen as occupation  
363 of man. This aligns with the social norms of majority of the world's small scale fishing  
364 communities, where men are the primary producers and women get engaged in fish processing,  
365 marketing and distribution.<sup>20</sup> Interestingly, a significant majority of women were involved in  
366 different fishing operations at the same time, demonstrating the variety and adaptability of their  
367 positions in this sector. Common daily chores were fish sorting and grading, fish cutting or scale  
368 removal, and minnow collection illustrating the multifarious nature of their employment. Women  
369 in the fisher communities also need to get engaged in household chores and caregiving to their

370 children.<sup>5</sup> Such double burden of household responsibilities and economic workload may have  
371 significant effect on their health.<sup>21</sup>

372 The study found a number of physical safety hazards that causes injuries to the women.  
373 Slippery surface in the workplace is a commonly reported hazard for women, which may not  
374 only cause acute injuries but also chronic musculoskeletal disorders. This finding is consistent  
375 with findings of other studies in Kenya<sup>11</sup> and India<sup>12</sup>, which also reported accidental falls and  
376 injuries happening among fisher women due to the slippery surface. Our study found the high  
377 occurrence of injuries among the women working in fisheries sector, which include sharp cut  
378 injuries, laceration, fracture, bruise, blunt trauma and amputation. Injuries among fisherwomen  
379 were also evidenced in previous studies among fisherfolks of coastal states in India<sup>22</sup>, Irular  
380 tribal community<sup>12</sup> and Fisherfolk in Kampi Samaki<sup>11</sup>. Although most of the injuries are minor  
381 and nonfatal, unable to properly treat the wound in a timely way may result in infection.<sup>23</sup> In  
382 Cox's Bazar and Chattogram coastal areas, as revealed by our study, the injuries can result  
383 from a range of workplace physical safety hazards such as fishing or minnow collecting  
384 instruments (e.g. nets), fish cutting instruments and fish stings or bites. Women engaged in dry  
385 fish processing need to cut or descale the fishes using sharp instruments, accidental handling of  
386 such instruments may result in the sharp cut injuries, laceration and even amputation of fingers.

387 Many of the women engage themselves in minnow collection at the seashores, specially, during  
388 monsoon season, using small fishing nets and bamboo poles. Some women reported cuts and  
389 trauma from such nets and poles. Although less common, a few women performing this activity  
390 also reported the risk of drifting away to sea while working near the coast. This finding could be  
391 consistent with the finding of Dutta<sup>13</sup>, who claimed women in Bangladesh engaged in fishing  
392 with their children possesses the risk of drowning since the traditional cloths are not flexible  
393 enough for free movement in the water. A few have reported injuries to their hands, legs, and  
394 feet from sharp stones, corals, or oysters submerged in water, particularly when working

395 submerged in sea water for collecting minnow or prawns. This hazard for cut injury was also  
396 reported by Velvizhi and Gopalakrishnan<sup>12</sup>, who argued that wounds resulting from oyster shells  
397 could generally be very deep, bleed profusely and get infected.

398 More than half of the women identified fish sting or fish bite as an agent for their injuries. Most of  
399 the women working in the fisheries sector are to directly handle the fishes for sorting, grading,  
400 cutting, descaling or drying. Those who engaged in dry fish processing also need to make  
401 special knots near around gum of some fish species. Since they handle the fishes without any  
402 personal protection equipment (e.g. gloves), they commonly encounter the injuries from the fish  
403 spines or teeth. Often, such injury leaves with short- and long-term pores on hands and feet of  
404 the women. Such injuries caused by fish species is common among men and women working in  
405 the fishery sector and reported by large number of studies in Nigeria<sup>8</sup>, Kenya<sup>11</sup> and India<sup>12</sup>. Fish  
406 stings and bites may also result in infections and subsequent amputation of fingers or toes.<sup>24</sup>

407 The study found high prevalence of musculoskeletal disease conditions among the women in  
408 fishery sector as reported by more than two-third of the interviewed women. This includes,  
409 generalized body ache, back pain, neck pain, joint pain and stiffness, reduced range of  
410 movement, muscle weakness, numbness of limbs and physical deformity. This is consistent with  
411 a study among fisherwomen in India, which found that 67% of the fisherwomen complaining of  
412 musculoskeletal pain and discomfort, especially for lower back, knee and upper back<sup>22</sup>. In our  
413 setting, this finding could be related to a wide range of ergonomic hazards identified by this  
414 study, such as working in uncomfortable body posture, prolonged sitting in an uncomfortable  
415 position and carrying heavy weight. One of the unique findings of this study is that we found  
416 women are to sit on their feet without any support to hip or back during their fish processing and  
417 minnow collecting activities. Such uncomfortable and unsupported body posture may result in  
418 different musculoskeletal conditions, including low back pain, cervical pain and joint pain.  
419 Women engaged in the fishery sector also need to manually carry heavy weight, such as fish

420 and dry fish, during their fish processing activity. Heavy weight carrying as a factor for  
421 musculoskeletal disease conditions among fisherwomen was also reported in previous  
422 studies<sup>11</sup>. Many of the women also need walk long distance for collecting and delivery of fish  
423 and fish products in our setting, which also may lead to musculoskeletal pain. This is consistent  
424 with the finding of the study among the Irular fisherwomen.<sup>12</sup>

425 Although, use of pesticide in dry fish industry is strictly prohibited by the law in Bangladesh,  
426 some women informed that they get exposed to pesticides in their dry fish farm. Occupational  
427 exposure of pesticide can be associated with respiratory health problems, including asthma,  
428 chronic obstructive pulmonary disease (COPD) and lung cancer.<sup>25</sup> Establishing an association  
429 between exposures of the fisherwomen to pesticide and developing different clinical conditions  
430 was beyond the scope of this research, since it requires clinical diagnosis of the cases.  
431 However, our study found a high rate of occurrence of self-reported respiratory complaints,  
432 especially chronic cough, respiratory distress and chronic respiratory discomfort/breathlessness  
433 among the fisherwomen. Further research is warranted to explore the association between  
434 chemical exposure and respiratory diseases.

435 Our study found that majority of the women get frequent contact with salt water (90%) and salt  
436 (81%) in their daily activities, and more than half of the women reported that they develop some  
437 kind of physical symptoms, such as eye irritation, skin irritation, ear itching and earache, in  
438 reaction to the salt water. We have also noted a high incidence of skin diseases among the  
439 women in fisher communities, including skin allergy, irritation, ulceration and wounds. Salt or  
440 salt water could be the potential factor for such incidents as a recent study<sup>26</sup> found that sodium  
441 chloride could be a potential factor in the progression of allergy in the skin. This could also be  
442 related to contact with certain fish species that provoke allergic reactions.<sup>27</sup> Velvizhi and  
443 Gopalakrishnan<sup>12</sup> argued that exposure to brackish water, jellyfish and algal bloom can result in

444 skin irritation, rashes and psoriasis among fisherwomen. However, further research is warranted  
445 to statistically establish the assumption.

446 The study found that nearly all (99%) of the women got exposed to direct sunlight for more than  
447 4 hours a day and majority of them reported some kind of reaction or sensitivity to sun  
448 exposure, which included headache, skin irritation, sun burn and eye irritation. Ultraviolet  
449 radiation of sunray may result in acute sunburn and chronic skin changes, including skin  
450 cancer.<sup>28</sup> Sunburn among fisherwomen was also reported as a health concern in Kenya.<sup>11</sup> Kyei  
451 et al.<sup>29</sup> identified seawater and sunrays as ocular hazards causing ocular irritation, tearing, red  
452 eyes and blurred vision. We also found high incidence of eye related diseases or symptoms  
453 among the women in fisherfolk, which include eye irritation, ocular pain, red eye and reduced  
454 vision. These could be related to the prolonged exposure to sun and/or saltwater.

455 Fisher folks in Chattogram and Cox's Bazar live in overcrowded settings with fragile shelter and  
456 compromised water, sanitation and hygienic practices. Our study found that more than three-  
457 fourth of the women in the fisherfolk did not have the provision of sanitary latrine and  
458 handwashing with soap at their workplaces. All these factors can contribute to a high burden of  
459 communicable diseases among the fisherfolk community. This could be evidenced by the fact,  
460 as found in our study, of a very high incidence of self-reported communicable diseases,  
461 specially, diarrhea, dysentery, flue/viral fever, respiratory infection, tuberculosis, skin infections  
462 and helminthiasis among the women in fisher communities. Moreover, we also found that nearly  
463 three-fourth of the women needed to remain wearing wet clothes for prolonged time. Weather in  
464 Bangladesh is hot and humid, especially during the summer. Both these factors – wet clothing  
465 and warm weather are risk factors for tinea<sup>30</sup>. Concurring this, in our study we found that half of  
466 the women had self-reported incidence of tinea in last 12 months. Although, the reported  
467 incidents communicable diseases were not clinically verified, intensified health promotion and

468 risk communication efforts are recommended both at community level and at workplace to  
469 improve the hygienic behavior and practices.

470 Many of the hazards could be mitigated by use of personal protective equipment, such as  
471 gloves, masks, sunglasses, sunscreen and gumboots.<sup>14</sup> However, we have found majority of the  
472 women in the fisher communities did not use any personal protection equipment at their  
473 workplace. While use of gloves could prevent many of the injuries associated with fish bite or  
474 sting and sharp instruments, commonly available heavy-duty gloves may not be feasible for  
475 fisherwomen since these are not suitable to use for fine work carried out by the women during  
476 fish processing. Therefore, personal protection equipment should be innovated or customized  
477 considering the local need, context and requirement. Moreover, the fisherwomen should be  
478 trained and mobilized for using personal protection equipment for their health and safety.  
479 Finally, we have found that the first aid kits were grossly unavailable at the workplace, with  
480 which injuries could be managed early and risk of wound infection could be prevented. Strong  
481 advocacy is needed to influence the fish industry players to make personal protection  
482 equipment and first aid kits available at the workplace.

483

#### 484 **Limitations of the Study:**

485 The study reported the hazards and health conditions based on the experiences shared by the  
486 participants. The conditions were not clinically validated. However, the author tried to mitigate  
487 the response bias by triangulation of qualitative and quantitative data and appropriate training of  
488 the enumerators on case definitions of clinical conditions. The study was also only descriptive in  
489 nature and did not have the component of analyzing the clinical correlation. Another limitation of  
490 the study was it did not include mental health and psychosocial aspects of the participants.

491



## 492 **Conclusion and Recommendations:**

493 Women in the fisher communities in Bangladesh are engaged in a wide range of activities in the  
494 fisheries sector. Our study found a high occurrence of occupational hazards experienced by the  
495 women, including physical safety, physical, chemical, ergonomic and biologic hazards. Due to  
496 unavailability of adequate preventive and safety measures, the hazards are resulting in a wide  
497 range of health risks and disease conditions among the women in the fisher communities,  
498 including injuries, musculoskeletal disorders, skin diseases, eye diseases, respiratory diseases  
499 and communicable diseases. However, their workplaces are pervasively missing with the  
500 availability of personal protection equipment, first aid kits and health and safety benefits.  
501 Notwithstanding the adversities, the women continue to work hard in the fishing industry, even  
502 though their efforts are merely acknowledged in the society. Therefore, a comprehensive  
503 multisectoral strategy, considering the below recommendations, needs to be undertaken to  
504 mitigate the occupational hazards and prevent associated diseases among the women in fisher  
505 communities promoting their health and wellbeing.

- 506 1. The women working in the fisheries sector should be trained on the occupational hazards  
507 and risks, and safety and preventive measures.
- 508 2. Procedure should be innovated or identified in consultation with fisheries sector experts  
509 regarding safe handling of fish and associated instruments to prevent injuries from physical  
510 safety hazards.
- 511 3. First aid kits should be made available at all workplaces and a focal person from the workers  
512 should be trained in the use of the kits.
- 513 4. Engineering and ergonomic innovations are necessary to prevent ergonomic hazards. This  
514 could include proper sitting arrangement, measures to avoid prolonged standing and  
515 convenient tools (e.g. carts, wheel barrows) to carry heavy weight.

- 516 5. Personal protection equipment should be made available to the women in the fisher folk and  
517 train and motivate them on their use. The PPE should be customized for use in the fisheries  
518 sector context.
- 519 6. Advocacy should be conducted to orient the fish industry owners on the occupational  
520 hazards, so that they improve the workplace safety and ergonomics and arrange measures  
521 to prevent physical hazards, including direct sun exposure and noise, and ensure use and  
522 supply of personal protection equipment.
- 523 7. Hygienic conditions should be improved at both workplace and personal level, including  
524 arrangement of sanitary latrines, soap and water for handwashing, safe drinking water and  
525 promotion of personal hygiene.
- 526 8. Restrict use of insecticide in dry fish processing and promote organic method of dry fish  
527 processing to prevent exposure to chemical hazards.
- 528 9. Establish a mechanism for regular health checkup of the women engaged in the fisheries  
529 sector to prevent disease or illness at early stage.
- 530 10. Advocacy should be conducted with the owner of the fisher industries to ensure maternal  
531 benefits, menstrual hygiene mechanisms at workplace.

532

## 533 **Acknowledgement**

534 The authors acknowledge Bright Bangladesh Forum and its staff, specially, Utpal Barua and  
535 Mahfuzur Rahman for arranging operational support for this study. We also thankful to the  
536 enumerators of the study, Tajmin, Abdullah, Mahbuba and Sawrin, for their support in  
537 quantitative data collection and field coordination.

538

## 539 **References:**

- 540 1. Key messages – the state of world fisheries and aquaculture 2022. FAO. Accessed  
541 December 5, 2023. [https://www.fao.org/3/cc0461en/online/sofia/2022/key-](https://www.fao.org/3/cc0461en/online/sofia/2022/key-messages.html)  
542 [messages.html](https://www.fao.org/3/cc0461en/online/sofia/2022/key-messages.html).
- 543 2. *The State of World Fisheries and Aquaculture 2022*. FAO. Published online 2022.  
544 doi:10.4060/cc0461en
- 545 3. Shamsuzzaman MdM, Islam MM, Tania NJ, Al-Mamun MdA, Barman PP, Xu X.  
546 Fisheries resources of Bangladesh: Present status and future direction. *Aquaculture and*  
547 *Fisheries*. 2017;2(4):145-156. doi:10.1016/j.aaf.2017.03.006
- 548 4. 'Invisible' fisher women of Bangladesh raise their voice. World Fish. Published March 3,  
549 2017. Accessed on November 07, 2023. [https://www.worldfishcenter.org/blog/invisible-](https://www.worldfishcenter.org/blog/invisible-fisher-women-bangladesh-raise-their-voice)  
550 [fisher-women-bangladesh-raise-their-voice](https://www.worldfishcenter.org/blog/invisible-fisher-women-bangladesh-raise-their-voice)
- 551 5. Halder, CE. Baseline Study: Empowerment of Fisherwomen in Coastal Chattogram and  
552 Cox's Bazar. Bright Bangladesh Forum. February, 2023.
- 553 6. Decent working conditions, safety and social protection – work in Fishing Convention  
554 No. 188 and Recommendation No. 199.  
555 [https://www.ilo.org/sector/Resources/publications/WCMS\\_161209/lang--en/index.htm](https://www.ilo.org/sector/Resources/publications/WCMS_161209/lang--en/index.htm).  
556 Published December 1, 2007.
- 557 7. Mandal S, Hasan I, Hawlader NH, Sultana I, Rahman MdM, Majumder MdSI.  
558 Occupational health hazard and safety assessment of fishermen community in coastal  
559 zone of Bangladesh. *International Journal of Health Economics and Policy*.  
560 2017;2(2):63. doi:10.11648/j.hep.20170202.14
- 561 8. Olaoye OJ, Ojebiyi WG. Occupational Health Hazards Associated with Nigerian  
562 Fisheries. In: *IntechOpen eBooks*. ; 2021. doi:10.5772/intechopen.94205

- 563 9. WHO/ILO joint estimates of the work-related burden of disease and injury, 2000-2016:  
564 global monitoring report. World Health Organization and the International Labour  
565 Organization. 2021. Accessed on November 07, 2023.  
566 [https://iris.who.int/bitstream/handle/10665/345242/9789240034945-](https://iris.who.int/bitstream/handle/10665/345242/9789240034945-eng.pdf?sequence=1)  
567 [eng.pdf?sequence=1](https://iris.who.int/bitstream/handle/10665/345242/9789240034945-eng.pdf?sequence=1)
- 568 10. *2021 COFI Declaration for Sustainable Fisheries and Aquaculture.*; FAO. 2021.  
569 doi:10.4060/cb3767en
- 570 11. Ngaruiya FW, Ogendi GM, Mokuia MA. Occupational health risks and hazards among  
571 the fisherfolk in Kampi Samaki, Lake Baringo, Kenya. *Environmental Health Insights*.  
572 2019;13:117863021988146. doi:10.1177/1178630219881463
- 573 12. Velvizhi S, Gopalakrishnan A. Occupational health hazards among Irular tribal  
574 fisherwomen fishing in Pichavaram Mangrove Water. *Journal of Fisheries and Life*  
575 *Sciences*. 2017;2(1):20-25.  
576 <https://www.fishlifesciencejournal.com/download/2017/v2.i1/11/11.pdf>.
- 577 13. Dutta NC, Mitu AA, Fazlur Rahman A, Rahman A. 8C.003 barriers of safety practice and  
578 health-seeking behavior among fishermen in coastal Bangladesh. *Abstracts*. Published  
579 online 2021. doi:10.1136/injuryprev-2021-safety.198
- 580 14. Barrow A, Kongira A, Nget M, et al. Epidemiology of occupational hazards and injuries  
581 among fishermen at Tanji fishing site in The Gambia: an analytical cross-sectional study  
582 design. *Environmental Health Insights*. 2022;16. doi:10.1177/11786302221088699
- 583 15. Guidance – sample size for qualitative research. Age UK. Accessed on October 20,  
584 2023. [https://www.ageuk.org.uk/globalassets/age-uk/documents/reports-and-](https://www.ageuk.org.uk/globalassets/age-uk/documents/reports-and-publications/reports-and-briefings/guidance--sample-size-estimation-for-qualitative-methods-april2017.pdf)  
585 [publications/reports-and-briefings/guidance--](https://www.ageuk.org.uk/globalassets/age-uk/documents/reports-and-publications/reports-and-briefings/guidance--sample-size-estimation-for-qualitative-methods-april2017.pdf)  
586 [sample size estimation for qualitative methods april2017.pdf](https://www.ageuk.org.uk/globalassets/age-uk/documents/reports-and-publications/reports-and-briefings/guidance--sample-size-estimation-for-qualitative-methods-april2017.pdf)

- 587 16. Focus Group Discussion. HERD. Published March 2016. Accessed December 7, 2023.  
588 <https://www.herd.org.np/uploads/frontend/Publications/PublicationsAttachments1/14854>  
589 [97050-Focus%20Group%20Discussion\\_0.pdf](https://www.herd.org.np/uploads/frontend/Publications/PublicationsAttachments1/14854/97050-Focus%20Group%20Discussion_0.pdf)
- 590 17. Moore, Steven R. Effects of Sample Size On the Representativeness of Observational  
591 Data Used In Evaluation. *Education and Treatment of Children*. 1998. 21 (2): 209–226.  
592 <http://www.jstor.org/stable/42899530>. Accessed 7 Dec. 2023.
- 593 18. Bhuyan S, Islam S. Present Status of Socio-economic Conditions of the Fishing  
594 Community of the Meghna River Adjacent to Narsingdi District, Bangladesh. *J Fisheries*  
595 *Livest Prod*. 2016; 4 (192). doi: 10.4172/2332-2608.1000192
- 596 19. Shahjahan Md, M.I. Miah, Haque MdM. Present status of fisheries in the Jamuna River.  
597 *Pakistan Journal of Biological Sciences*. 2001;4(9):1173-1176.  
598 doi:10.3923/pjbs.2001.1173.1176
- 599 20. Understanding the cultures of fishing communities: a key to fisheries management and  
600 food security. *FAO Fisheries Technical Paper*.  
601 2000;401:[https://repository.arizona.edu/bitstream/handle/10150/292622/azu\\_stoffle\\_bue](https://repository.arizona.edu/bitstream/handle/10150/292622/azu_stoffle_buen_hombre_fao_report_w.pdf?sequence=1&isAllowed=y)  
602 [n\\_hombre\\_fao\\_report\\_w.pdf?sequence=1 & isAllowed=y](https://repository.arizona.edu/bitstream/handle/10150/292622/azu_stoffle_buen_hombre_fao_report_w.pdf?sequence=1&isAllowed=y).
- 603 21. Tripathi P, Kamath R, Tiwari RR. Occupational health and role of gender: A study in  
604 informal sector fisheries of Udupi, India. *Indian Journal of Occupational and*  
605 *Environmental Medicine*. 2017;21(2):45. doi:10.4103/ijoem.ijoem\_170\_16
- 606 22. Nag PK, Nag A. Hazards and health complaints associated with fish processing activities  
607 in India—Evaluation of a low-cost intervention. *International Journal of Industrial*  
608 *Ergonomics*. 2007;37(2):125-132. doi:10.1016/j.ergon.2006.10.012
- 609 23. Erondy E, Anyanwu P. Potential hazards and risks associated with the Aquaculture  
610 Industry. *African Journal of Food, Agriculture, Nutrition and Development*. 2011;4(13).  
611 doi:10.4314/ajfand.v4i13.71775

- 612 24. Olaoye OJ, Odebiyi OC, Abimbola OT. Occupational Hazards and Injuries Associated  
613 with Fish Processing in Nigeria. *Journal of Aquatic Science*. 2015;3(1):1-5.  
614 doi:10.12691/jas-3-1-1
- 615 25. Ye M, Beach J, Martin JW, Senthilselvan A. Pesticide exposures and respiratory health  
616 in general populations. *Journal of Environmental Sciences*. 2017;51:361-370.  
617 doi:10.1016/j.jes.2016.11.012
- 618 26. Matthias J, Maul J, Noster R, et al. Sodium chloride is an ionic checkpoint for human  
619 TH2 cells and shapes the atopic skin microenvironment. *Science Translational Medicine*.  
620 2019;11(480). doi:10.1126/scitranslmed.aau0683
- 621 27. Nagano T, Kanao K, Sugai T. Allergic contact urticaria caused by raw prawns and  
622 shrimps: Three cases. *The Journal of Allergy and Clinical Immunology*. 1984;74(4):489-  
623 493. doi:10.1016/0091-6749(84)90383-x
- 624 28. Benedetti J. Overview of Effects of Sunlight. MSD Manual. Updated October 2023.  
625 Accessed October 20, 2023. [https://www.msdmanuals.com/professional/dermatologic-](https://www.msdmanuals.com/professional/dermatologic-disorders/reactions-to-sunlight/overview-of-effects-of-sunlight)  
626 [disorders/reactions-to-sunlight/overview-of-effects-of-sunlight](https://www.msdmanuals.com/professional/dermatologic-disorders/reactions-to-sunlight/overview-of-effects-of-sunlight). Last accessed on: 20  
627 October 2023.
- 628 29. Kyei S, Owusu-Ansah A, Boadi-Kusi SB, Abbey DN, Abu EK. Occupational hazards  
629 correlates of ocular disorders in Ghanaian fisheries. *Healthcare in Low-resource*  
630 *Settings*. 2016;4(2). doi:10.4081/hls.2016.5482
- 631 30. Aaron DM. Tinea Cruris (Jock Itch). MDS Manual. Updated September 2023. Accessed  
632 October 20, 2023. [https://www.msdmanuals.com/professional/dermatologic-](https://www.msdmanuals.com/professional/dermatologic-disorders/fungal-skin-infections/tinea-cruis-jock-itch)  
633 [disorders/fungal-skin-infections/tinea-cruis-jock-itch](https://www.msdmanuals.com/professional/dermatologic-disorders/fungal-skin-infections/tinea-cruis-jock-itch)

634

## 635 **Supporting information**

636 **S1. Dataset of the study.** Dataset of the study is attached as reference.
